# Supplementary material
Source: MDPI journal article supplement (https://www.mdpi.com/2297-8739/8/3/27)
Supplement: s1 [file s1]

# Speciation and Determination of Selenium Oxyanions at the Drinking Water Pollution Concentration Levels

Kyriaki Kalaitzidou <sup>1</sup>, Evangelia Bidiou <sup>2</sup> and Anastasios Zouboulis <sup>2,\*</sup>, Manassis Mitrakas <sup>1</sup>

<sup>1</sup> Department of Chemical Engineering, Aristotle University of Thessaloniki, 54124 Thessaloniki, Greece; kikalaiz@geo.auth.gr; mmitraka@auth.gr

<sup>2</sup> Department of Chemistry, Aristotle University of Thessaloniki, 54124 Thessaloniki, Greece; ekmpidiou@gmail.com

\* Correspondence: zoubouli@chem.auth.gr; Tel.: +30-2310-997794

## Text S1

- The iron content of adsorbents was determined by the dissolution of sample in HCl and the measurement of iron by flame atomic absorption spectroscopy, using a Perkin Elmer AAnalyst 800 instrument.
- The surface area of the adsorbents was measured by nitrogen gas adsorption at liquid N<sub>2</sub> temperature (77 K), using a micropore surface area analyzer, according to the Brunauer-Emmett-Teller (BET) model.
- The determination of isoelectric point (IEP) in a water dispersion of oxy-hydroxide solid was performed by the respective curve of zeta-potential against the pH value at 20 ± 1°C. The sample initially prepared by suspending 50 mg of fine oxy-hydroxide powder into 1 L of electrolyte solution (0.01 M NaNO<sub>3</sub>). Then, several volumes of 100 mL were equilibrated at different pH values (4-10) for 60 min by adding either HNO<sub>3</sub> or NaOH solutions (1 N) under stirring. The electrophoretic velocity of at least 20 particles was subsequently reported via a digital camera, using a Rank Brothers Micro-Electrophoresis Apparatus Mk II device and the ζ-potential value was calculated accordingly.
- The surface charge density of the adsorbents and the point of zero charge (ZPC) were estimated by using the potentiometric mass titration method [1].

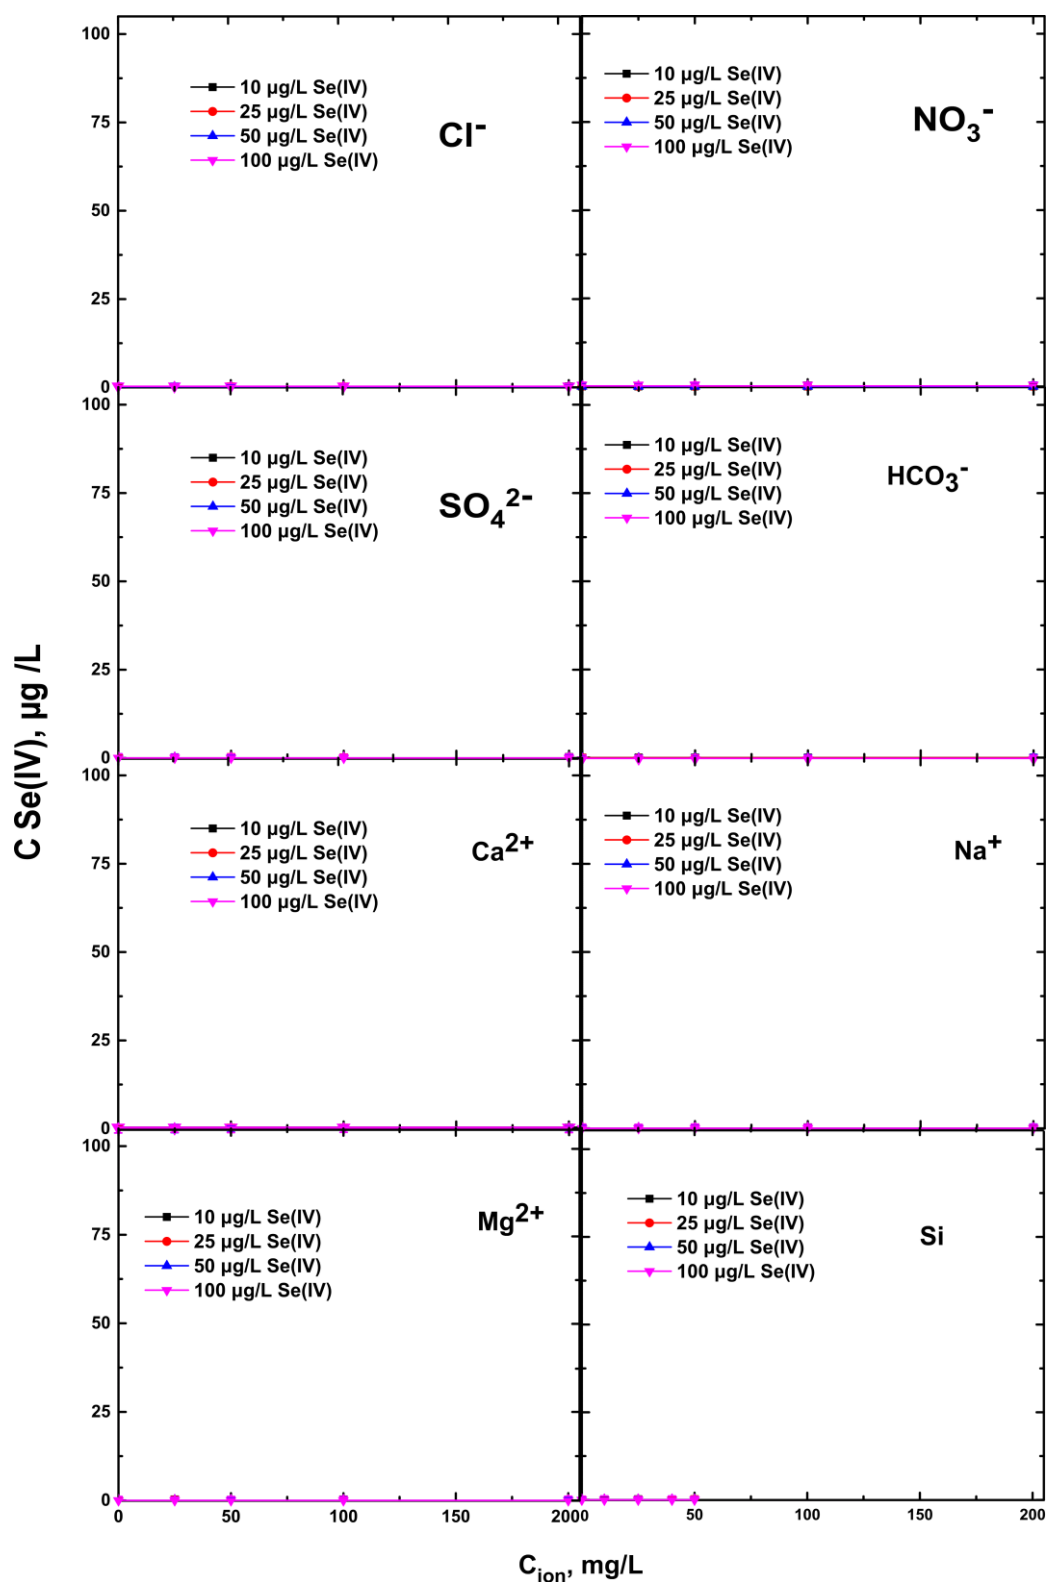

**Figure S1.** Influence of common water ions on Se(IV) residual concentration (due to adsorption) by the use of Bayoxide material. Experimental conditions: Bayoxide concentration 0.5 g/L, initial Se(IV) concentration range 10–100 µg/L, pH 7.3±0.2, temperature 20° C and contact time 30 min.

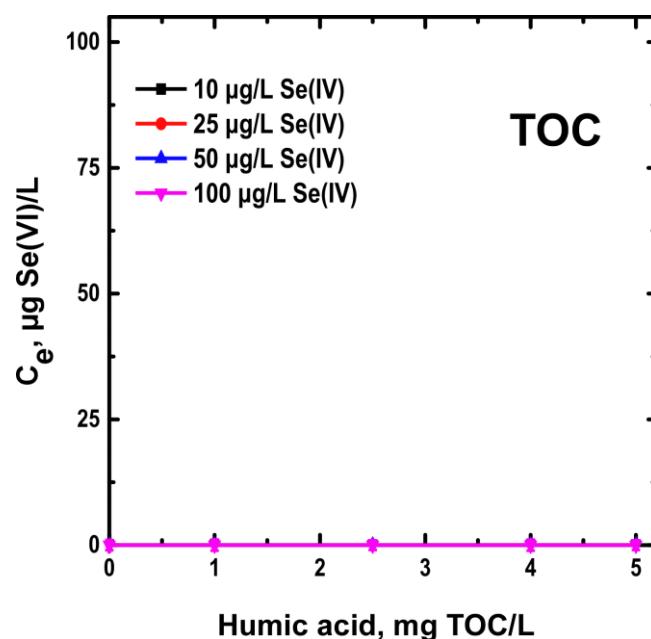

**Figure S2.** Influence of Natural Organic Matter, as simulated by different humic acid concentrations, on the Se(IV) adsorption by the use of Bayoxide material. Experimental conditions: Bayoxide concentration 0.5 g/L, initial Se(IV) concentration range 10–100  $\mu\text{g/L}$ , pH  $7.3 \pm 0.2$ , temperature  $20^\circ\text{C}$  and contact time 30 min.

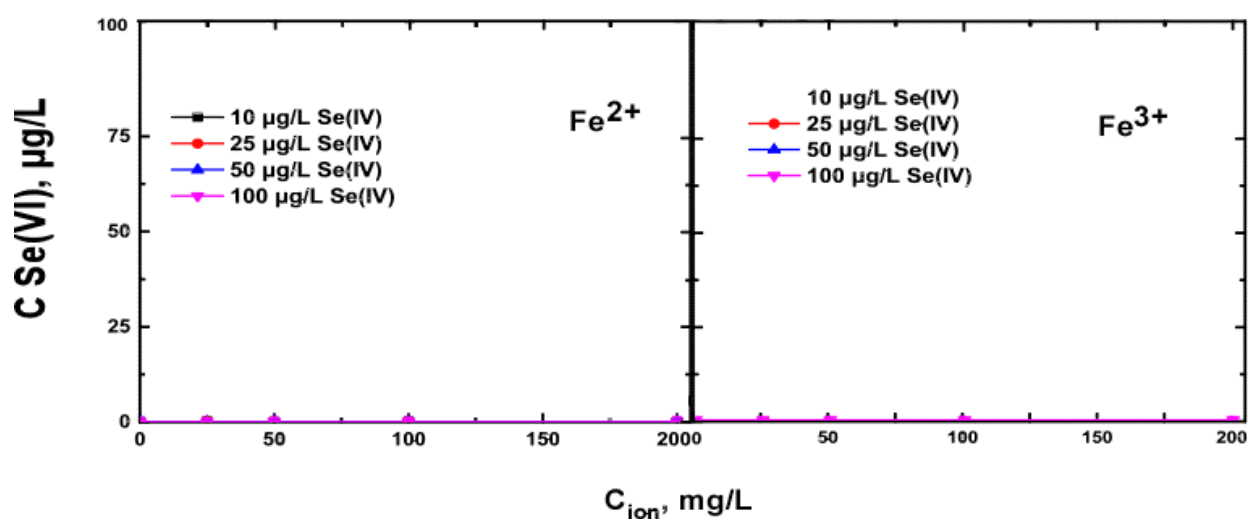

**Figure S3.** Influence of iron found in natural waters on Se(IV) adsorption by Bayoxide. Experimental conditions: Bayoxide concentration 0.5 g/L, initial Se (IV) concentration range 10–100  $\mu\text{g/L}$ , pH  $7.3 \pm 0.2$ , temperature  $20^\circ\text{C}$ , and contact time 30 min.

## Supplementary reference

1. Kosmulski M. *Surface charging and points of zero charge, Surface Charging and Points of Zero Charge*. 1<sup>st</sup> ed.; CRC Press, Boca Raton 2009. doi:10.1201/9781420051896
